# Supplementary material for: Knowledge, attitudes and behaviors on antibiotic use and resistance among healthcare workers in Italy, 2019: investigation by a clustering method
Source: PubMed Central journal article supplement (PMC8431867; doi:10.1186/s13756-021-01002-w), 2021-09-10

## Additional file 1

**Supplementary Figure 1.** Proportion of healthcare workers participating in the survey on antibiotic use and antibiotic resistance, stratified by cluster and social media use, Italy, 2019 (n = 1,693). \*\* p-values <0.01 or \*\*\* p-values <0.001. Differential use of social media by the HCWs who participated in the ECDC survey on antibiotic use and antibiotic resistance.

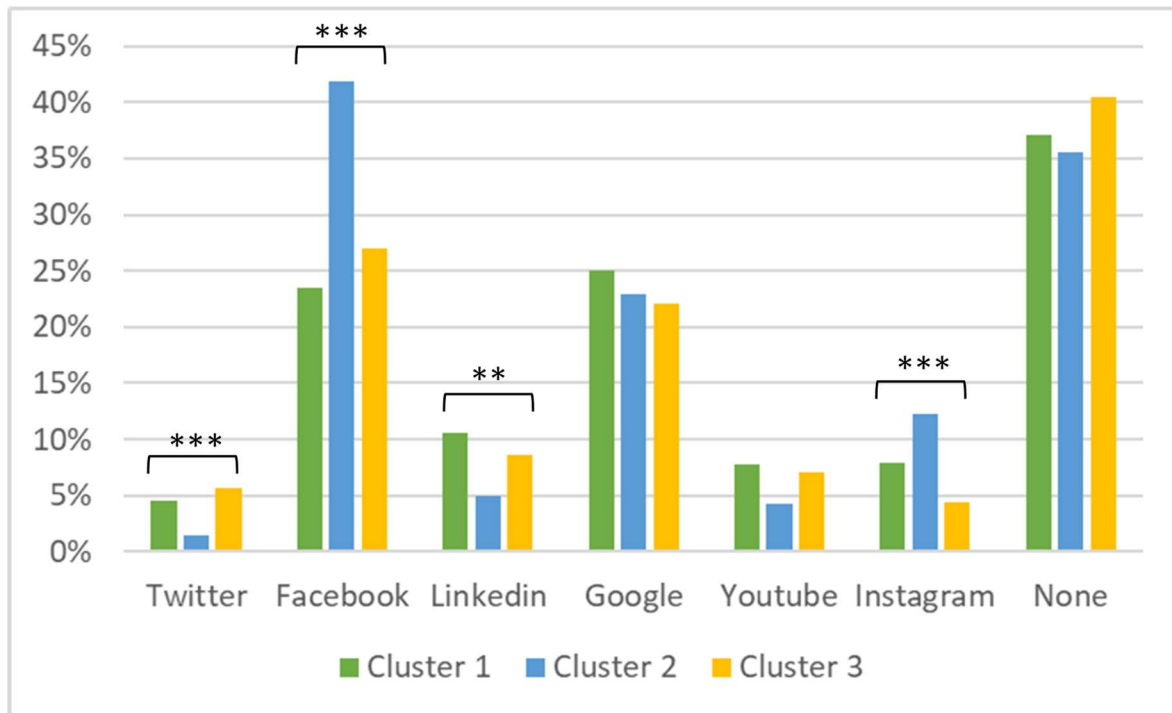

Supplement: 13756_2021_1002_MOESM1_ESM.pdf [file 13756_2021_1002_MOESM1_ESM.pdf]
